# Supplementary material for: Photodynamic Antibacterial Therapy of Gallic Acid-Derived Carbon-Based Nanoparticles (GACNPs): Synthesis, Characterization, and Hydrogel Formulation
Source: MDPI journal article supplement (doi:10.3390/pharmaceutics16020254), 2024-02-09
Supplement: s1 [file s1]

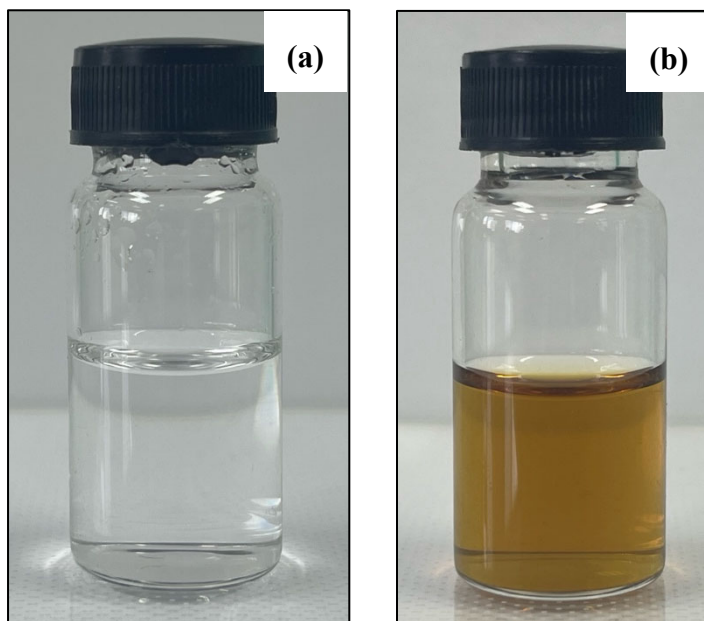

**Figure S1.** The photographic images of (a) gallic acid solution before synthesis and (b) GACNP dispersion.

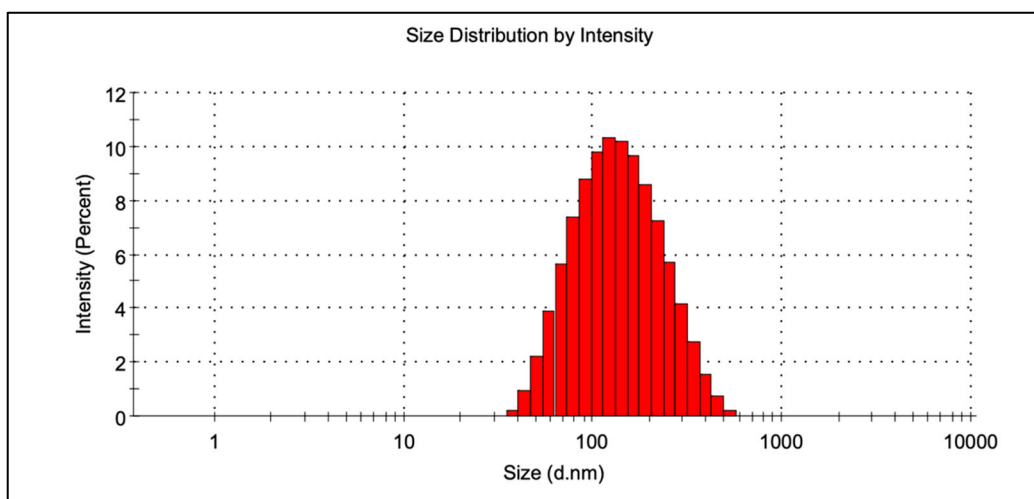

**Figure S2.** The photographic images of the histogram of the DLS of the nanoparticles.

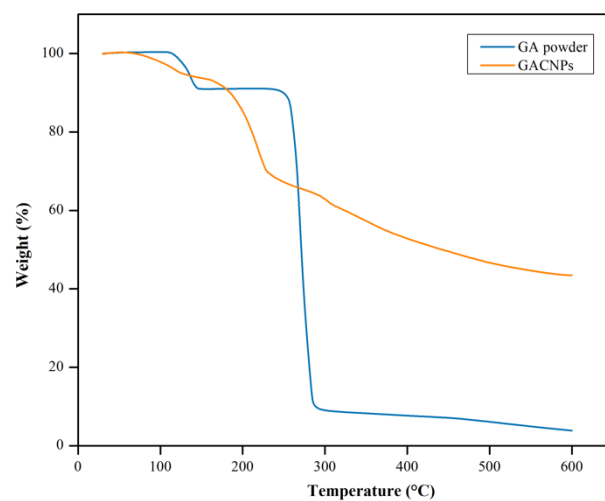

**Figure S3.** TGA thermograms of the GACNPs at a scan rate of 10 °C/min below 600 °C.

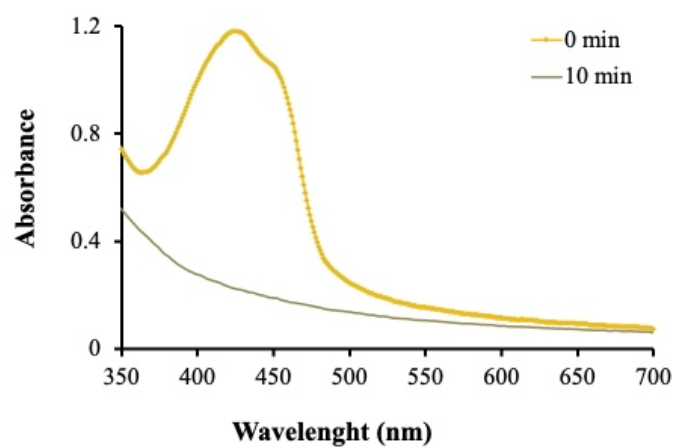

**Figure S4.** The UV-vis absorbance of DBPF mixed with GACNPs at different light exposure times, 0 and 10 min.

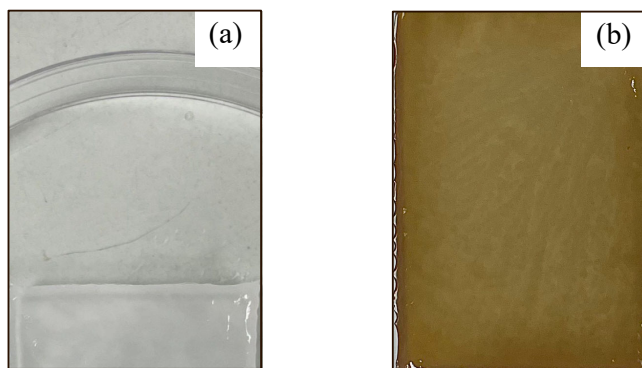

**Figure S5.** The photographic images of (a) blank hydrogel and (b) GACNP-loaded hydrogel patches.

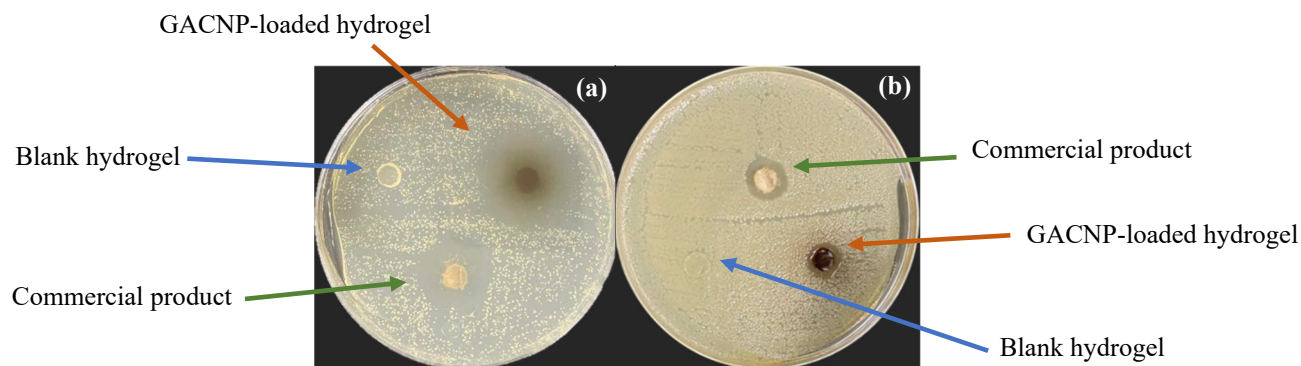

**Figure S6.** The photographic images of the inhibition zone of blank hydrogel, commercial product, and GACNP-loaded hydrogel against both (a) *S. aureus* and (b) *E. coli*. with visible light (power density = 0.12 W/cm<sup>2</sup>).

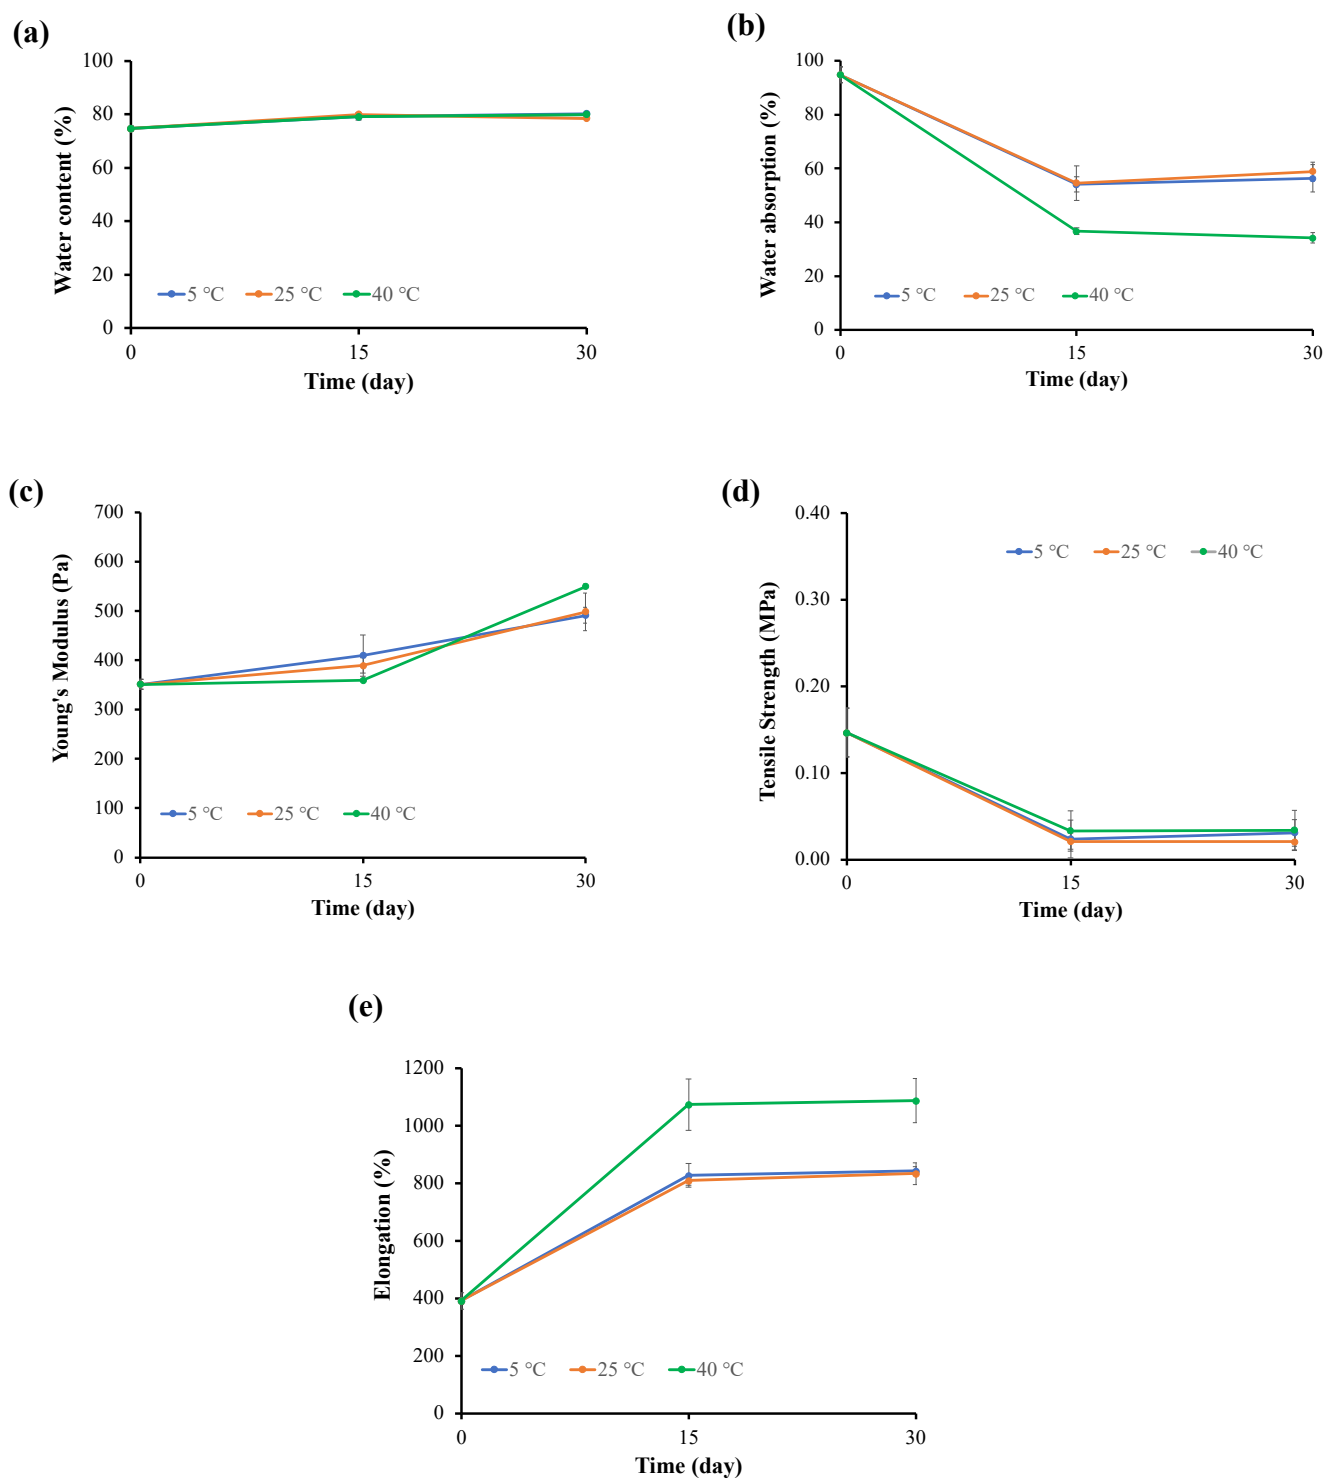

**Figure S7.** The stability of GACNP-loaded hydrogel patches: (a) Water content (%), (b) Water absorption (%), (c) Young's Modulus (Pa), (d) Tensile Strength (MPa), and (e) Elongation (%) of hydrogel patches kept at 5 °C, 25 °C, and 40 °C.
